# Supplementary material
Source: ML conference proceedings conference paper supplement (https://proceedings.neurips.cc/paper_files/paper/2022/hash/c9f95e9ec39fa5ad3d0a562b993b92aa-Abstract.html)
Supplement: Supplementary file 1 [file c9f95e9ec39fa5ad3d0a562b993b92aa-Supplemental-Conference.zip]

Archive with 2 entries (2 files):
- NeurIPS2022_RelationalProxies_Appendix.pdf
- NeurIPS2022_RelationalProxies_Supp.pdf
